# Supplementary material for: Modification of Meso-Micromixing Interaction Reaction Model in Continuous Reactors
Source: MDPI journal article supplement (doi:10.3390/pr11051576), 2023-05-22
Supplement: s1 [file s1]

Archive with 1 entries (1 files):
- processes-2391167-supplementary.pdf
