# Supplementary material for: Modification of Meso-Micromixing Interaction Reaction Model in Continuous Reactors
Source: MDPI journal article supplement (doi:10.3390/pr11051576), 2023-05-22
Supplement: s1 [file s1 › processes-2391167-supplementary.pdf]

---

Modification of meso-micromixing interaction reaction model in the continuous reactors

*Junan Jiang, Ning Yang, Hanyang Liu, Jianxin Tang, Chenfeng Wang, Rijie Wang, Xiaoxia Yang*

[Contents](#)

Accuracy Verification and Mesh Independent Test

The principle of Villiermaux–Dushman Method

The principle of Gaussian process regression and Bayesian optimization

The raw data for multi-objective optimization

Nomenclature

References

## 1. Accuracy Verification and Mesh Independence Test

### 1.1 Accuracy Verification

#### 1.1.1 Turbulence Model

To verify the reliability of the simulation, the pressure drop in the fully developed section of a reactor with specific parameters was obtained by both experiments and simulations. The results indicate that the maximum deviation for pressure drop is 4.5%. Therefore, the reliability of the used algorithm was verified. The non-ideal flow causes the fluid to consume a small amount of additional energy as it passes through the bends and joints in the experiment, so the experimental values are always a little larger than those of the simulations.

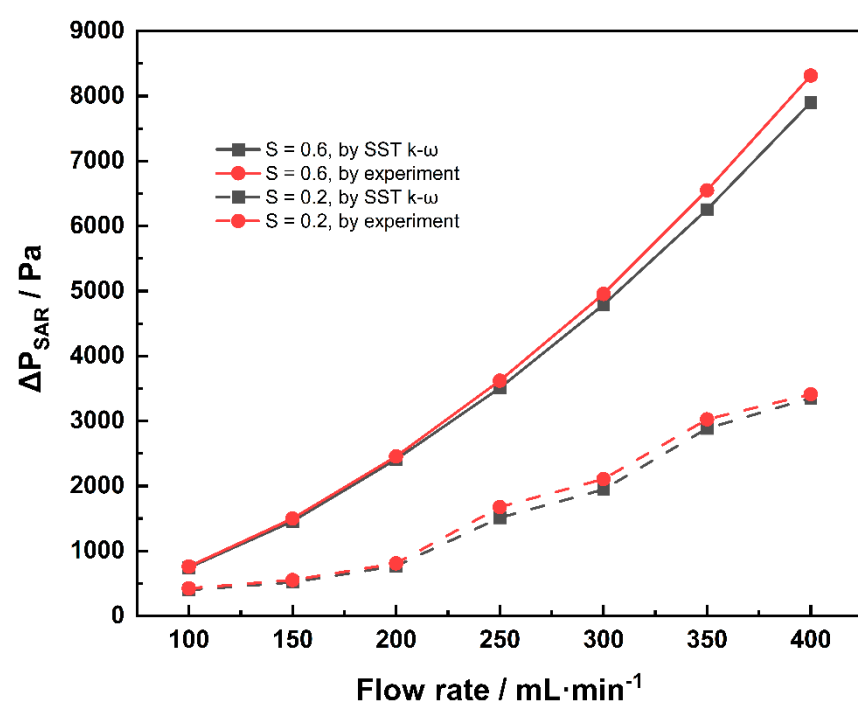

Figure S1 Verification of the numerical and experimental results about the pressure drop of both  $S = 0.2$  and  $S = 0.6$ , with different flow rates.

#### 1.1.2 Validation between micromixing time results in CFD simulation and experiments

To further verify the accuracy of selected model, we also test the micromixing time under different conditions by both experiments and simulations. It aims to check if it is responsible to use numerical simulation to acquire the micromixing time, since many, 100 sets of results for multi-objective optimization should be acquired. However, this can be also used to check if the model is appropriate. The error limits for both were set at  $\pm 25\%$  according to J.M. Commenge's study[1]. According to the results, the maximum relative deviation is 13.48% while the minimum one is 0.24%. Therefore, SST k- $\omega$  turbulent model can meet the demand to calculate.

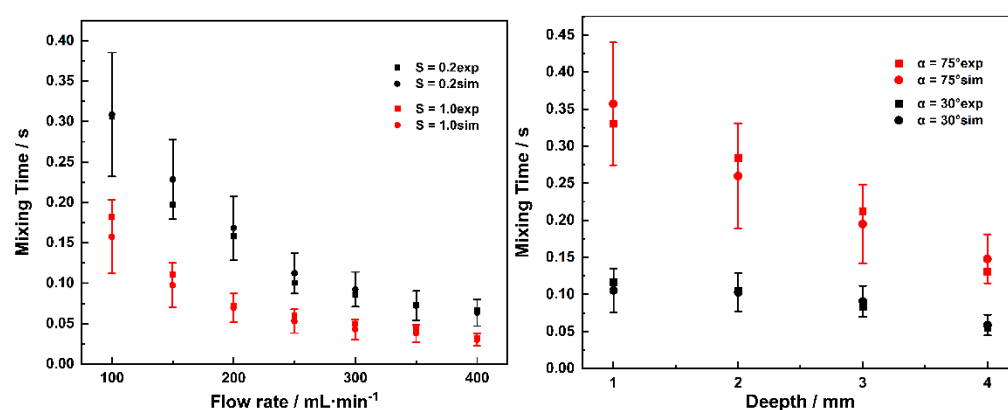

Figure S2 Error lines of mixing time with different parameters: (a) cases with changing flow rates and skewness; (b) cases with changing groove depth and circulation angles. Here, the square and circle symbols represent experimental and simulation results, respectively.

## 1.2 Mesh Independence Test

Concentration and energy dissipation rate are more difficult parameters to calculate accurately for simulations of split-and-recombine millimeter-scale reactors, since more and higher quality discrete grids are required to simulate these parameters. Therefore, steady-state simulations of SAR reactors with a specific structure and appropriate flow rates were used to complete the grid independence test,  $\alpha=45^\circ$ ,  $d=3$  mm,  $S=0.4$ ,  $L_G=10$  mm, and  $F=300$  mL/min. The criteria evaluated were the overall reactor pressure drop, viscous dissipation rate (VDR), and UIAW along the reactor axial direction at 35 mm. The results are shown in Table S1.

Table S1 Grid independence test

| Grid No. | Grid Number | $\Delta P$ , Pa | Relative Error- $\Delta P$ | VDR, W/kg               | Relative Error-VDR | UIAW   | Relative Error-UIAW |
|----------|-------------|-----------------|----------------------------|-------------------------|--------------------|--------|---------------------|
| 1        | 5255206     | 49.2548         | -                          | $1.5965 \times 10^{-5}$ | -                  | 0.8497 | -                   |
| 2        | 6151520     | 49.3533         | 0.199%                     | $1.6039 \times 10^{-5}$ | 0.464%             | 0.8339 | 1.86%               |
| 3        | 7340895     | 49.3340         | 0.0391%                    | $1.6072 \times 10^{-5}$ | 0.206%             | 0.8422 | 0.995%              |
| 4        | 8849516     | 49.3365         | 0.00507%                   | $1.6101 \times 10^{-5}$ | 0.180%             | 0.8450 | 0.332%              |

All the relative error was calculated from the results of the grid in a certain row corresponding to the ones of the previous row. Therefore, when the relative error from one grid number is quite low, we can choose that to simulate. From Table S1, the relative errors of pressure drop and VDR between grid 3 and 4 are similar. In one hand, the relative errors in grid 3 are all less than 1%, which can meet the requirement of calculation accuracy. In the other hand, it will cost much more time to simulate one case using grid 4. Hence, grid 3 with grid number 7340895 was chosen to conduct the simulations.

A hybrid mesh with a tetrahedral mesh as the primary was generated. The overall grid size of the annular gap and mixing structure was 0.16mm. And the grid was refined at the wall surface, with the growth rate of boundary layers 1.1 and the numbers of boundary layers of 5. All the grids obtained have the skewness less than 85%, which meets the needs of grid quality.

## 2. The principle of Villiermaux–Dushman Method[2-4]

In this method, borate neutralization is quasi-instantaneous with characteristic time  $\tau_1$ ; the second, the Dushman reaction is slower and has characteristic time  $\tau_2$  close to the mixing time  $t_m$ . The balanced reactions can be modeled as follows:

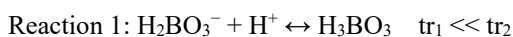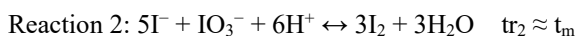

The iodine  $\text{I}_2$  further reacts with iodide ions  $\text{I}^-$ , yielding  $\text{I}_3^-$  ions following the quasi-instantaneous equilibrium reaction:

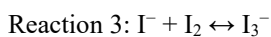

The principle of this method is to add, in stoichiometric deficit, a small amount of  $\text{H}^+$  to the initial  $\text{I}^-$ ,  $\text{IO}_3^-$  and  $\text{H}_2\text{BO}_3^-$ . When sufficient micromixing is achieved in the reactor, the added  $\text{H}^+$  will be completely consumed by reaction 1, so that no  $\text{I}_2$  and subsequent  $\text{I}_3^-$  produced. On the other hand, when the mixing process is not sufficiently fast to sustain reaction 1, the local overconcentration of  $\text{H}^+$  produces  $\text{I}_2$  by reaction 2, which reacts with  $\text{I}^-$  to yield  $\text{I}_3^-$ . Therefore, it is necessary to use a UV-vis spectrometer at a wavelength of 353 nm to determine the concentration of  $\text{I}_3^-$  generated in the system and obtain the concentration of various ions. The following equation is used to calculate the Segregation Index ( $X_S$ ), an important parameter for evaluating the micromixing performance.  $X_S$  ranges between 0 (complete micromixing) and 1 (no micromixing), so it can be used to characterize the degree of micromixing.

$$X_S = \frac{Y}{Y_{ST}} = \frac{2([I_2] + [I_3^-])}{[H^+]_0} \left( \frac{Q_p}{Q_{H^+}} + 1 \right) \left( \frac{[H_2BO_3^-]}{6[IO_3^-]_0} + 1 \right) \quad (1)$$

where  $Q_i$  denotes the molar flow rate of component  $i$ ,  $[j]$  the concentration of component  $j$ , and the subscript 0 denotes the original reaction mixture. According to the conventional definition,  $Y$  is the ratio of the quantity of  $\text{H}^+$  transformed into  $\text{I}_2$  following the second reaction to the total quantity of injected  $\text{H}^+$  and  $Y_{ST}$  is the value of  $Y$  in the case of total segregation.

The mass balance on  $\text{I}_2$  leads to the following expression:

$$[I_2]^2 - \left( \left( \frac{3}{5} \right) [I^-]_0 - \frac{8}{5} [I_3^-] \right) [I_2] + \frac{3}{5} \frac{[I_3^-]}{5K_B} = 0 \quad (2)$$

where  $K_B$  is the equilibrium constant of reaction 3 which depends on the solution temperature:

$$\log_{10} K_B = \frac{555}{T} + 7355 - 2575 \log_{10}(T) \quad (3)$$

For conducting the experiments, two solutions were prepared. The sulfuric acid solution was equipped separately. Another buffer solution containing boric acid and sodium hydroxide was added to the mixed solution of potassium iodide and potassium iodate to form a single homogeneous solution. The purpose of adding the buffer solution was to prevent iodate and iodide react with  $\text{H}^+$  of boric acid in the solution.

In order to obtain the mixing time, an incorporation model in terms of micromixing is introduced. The basic theory of this model is [5]: two fluids enter the reactor at the same time and one of them is dispersed into numerous tiny fluid clusters, which in turn incorporate and react with the other fluid. When the incorporation rate is constant, the controlling equation of this model is

$$\frac{dC_j}{dt} = (C_{j0} - C_j) \frac{1}{g} \frac{dg}{dt} + R_j \quad (4)$$

where  $C_{j0}$  is the initial concentration of component  $j$ ,  $C_j$  the concentration at time  $t$  and  $R_j$  the incorporation rate of component  $j$ .  $g(t)$  depends on the incorporation model mechanism and represents the volume growth of the fluid, which is expressed as

$$g(t) = \exp\left(\frac{t}{t_m}\right) \quad (5)$$

Combining these three reactions, the kinetic equations for each ion can be obtained. A series of  $t_m$  is substituted into ODEs (Eqn. (4)) solved by fourth-order Runge-Kutta method. When  $\text{H}^+$  concentration is less than 0, the iteration stops. The following algorithm was implemented using a self-programmed MATLAB: assuming a  $t_m$  first, the corresponding  $X_S$  can be obtained. When the

difference between the experimental value ( $X_s$ ) and calculated one ( $X_s'$ ) satisfies the error limit, the iteration stops, obtaining  $t_m$ , otherwise goes into the next round of calculation until the error limit is satisfied.

### 3. The principle of Gaussian process regression and Bayesian optimization

Gaussian process regression (GPR) is a widely accepted surrogate model. The core criterion of Gaussian process regression is that any finite combination of linear functions obeys a joint Gaussian distribution. This process cannot obtain a specific function form. Conversely, it enables all the sample points to pass through the fitting function and narrow the value range of each dependent variable so that it is closer to the Gaussian distribution with the maximum probability density. Finally, a set of predicted values can be obtained with the highest  $R^2$  and lowest MSE.

Assume that there are many sample points  $(\mathbf{x}^*, \mathbf{y}^*)$ . Note that  $\mathbf{x}^*$  and  $\mathbf{y}^*$  should be vectors. These are used to predict the new generation of independent and dependent variables, named  $\mathbf{x}$  and  $\mathbf{f}$ .  $(\mathbf{x}^*, \mathbf{y}^*)$  and  $(\mathbf{x}, \mathbf{f})$  should jointly obey the multivariate Gaussian distribution, shown in Eq. (6), where  $\mu_f, \mu_y$  are the mean functions of the predicted and observed values, respectively.  $\begin{bmatrix} K_{ff} & K_{fy} \\ K_{fy}^T & K_{yy} \end{bmatrix}$

is the kernel function, which is RBF function (Eq. (7)) in this study.

Then, Eq. (8) can act as a posterior distribution to get the  $\mathbf{f}$  and the shape of regression curve. This curve is called surrogate function. It allows us to acquire a certain distribution about the function, and any function acquired by sampling on that distribution can be a mapping between the dependent and independent variables.

$$\begin{bmatrix} \mathbf{f} \\ \mathbf{y}^* \end{bmatrix} \sim \mathcal{N} \left( \begin{bmatrix} \mu_f \\ \mu_y \end{bmatrix}, \begin{bmatrix} K_{ff} & K_{fy} \\ K_{fy}^T & K_{yy} \end{bmatrix} \right) \quad (6)$$

$$\begin{bmatrix} K_{ff} & K_{fy} \\ K_{fy}^T & K_{yy} \end{bmatrix} = \sigma^2 \exp \left( -\frac{\|x_i - x_j\|_2^2}{2l^2} \right) \quad (7)$$

$$\mathbf{f}|\mathbf{x}^*, \mathbf{y}^* \sim \mathcal{N}(K_{fy}^T K_{ff}^{-1} \mathbf{y} + \mu_f, K_{yy} - K_{fy}^T K_{ff}^{-1} K_{fy}) \quad (8)$$

In addition to regression, the Gaussian process can be also applied to optimize, i.e. Bayesian optimization. After obtaining the surrogate model, we can use an acquisition function to find the expected  $\mathbf{x}$  when the function values are minimum. Assuming that in the sample, the minimum  $\mathbf{y}'$  occurs at the point  $\mathbf{x}'$ . To find the new generation of minimum  $\mathbf{y}$  is equivalent to maximizing  $\mathbf{y}' - \mathbf{y}$ , so the difference can be expressed as

$$I(\mathbf{x}) = \max(\mathbf{y}' - \mathbf{y}, 0) \quad (9)$$

As a result, finding the minimum of  $\mathbf{y}$  means maximum  $I(\mathbf{x})$ , therefore, the expectation of  $I(\mathbf{x})$  is a typical acquisition function, which can be represented as:

$$EI(\mathbf{x}) = (\mathbf{y}' - \mu) \Phi \left( \frac{\mathbf{y}' - \mu}{\sigma} \right) + \sigma \phi \left( \frac{\mathbf{y}' - \mu}{\sigma} \right) \quad (10)$$

For each  $\mathbf{x}$ , we get two hyperparameters  $\mu$  and  $\sigma$  through Gaussian process. These two hyperparameters are substituted to Eq. (8) to find  $\mathbf{x}$  corresponding to the maximum value of EI.

### 4. The raw data for multi-objective optimization

The data including 100 sets of design points, mesomixing and micromixing characteristic time, pressure drop and two yields is presented in Table S3.

Table S3 The raw data for multi-objective optimization

|             | $T$   | $\alpha$ | $d$  | $F$    | $t_d$   | $t_m$   | $\Delta P_{SAR}$ | $Y_1$ | $Y_2$ |
|-------------|-------|----------|------|--------|---------|---------|------------------|-------|-------|
| <b>DP1</b>  | 0.424 | 72.9     | 2.88 | 399.22 | 0.01715 | 0.09113 | 1726.65          | 0.374 | 0.557 |
| <b>DP2</b>  | 0.719 | 25.9     | 3.14 | 287.18 | 0.00704 | 0.03109 | 20488.75         | 0.238 | 0.704 |
| <b>DP3</b>  | 0.295 | 57.2     | 4.57 | 315.90 | 0.00707 | 0.04456 | 6216.24          | 0.593 | 0.305 |
| <b>DP4</b>  | 0.785 | 52.5     | 4.91 | 119.35 | 0.00730 | 0.05597 | 8203.02          | 0.547 | 0.375 |
| <b>DP5</b>  | 0.674 | 31.0     | 2.00 | 203.72 | 0.01598 | 0.07907 | 4359.80          | 0.140 | 0.828 |
| <b>DP6</b>  | 0.580 | 21.1     | 1.35 | 216.02 | 0.01370 | 0.06008 | 7748.70          | 0.090 | 0.888 |
| <b>DP7</b>  | 0.373 | 16.8     | 1.73 | 262.40 | 0.01064 | 0.04370 | 12217.60         | 0.112 | 0.861 |
| <b>DP8</b>  | 0.730 | 62.5     | 1.50 | 139.32 | 0.04319 | 0.27511 | 480.13           | 0.267 | 0.699 |
| <b>DP9</b>  | 0.873 | 68.5     | 4.26 | 150.86 | 0.01254 | 0.08907 | 3297.06          | 0.859 | 0.102 |
| <b>DP10</b> | 0.637 | 43.9     | 3.50 | 357.88 | 0.00804 | 0.03877 | 10096.89         | 0.357 | 0.563 |
| <b>DP11</b> | 0.280 | 35.5     | 2.71 | 374.51 | 0.01217 | 0.05716 | 4570.42          | 0.263 | 0.675 |
| <b>DP12</b> | 0.458 | 64.9     | 2.07 | 331.63 | 0.02297 | 0.12017 | 1222.83          | 0.266 | 0.684 |
| <b>DP13</b> | 0.975 | 49.2     | 2.53 | 185.59 | 0.01751 | 0.09706 | 3101.37          | 0.209 | 0.750 |
| <b>DP14</b> | 0.544 | 36.0     | 4.75 | 353.20 | 0.00326 | 0.01676 | 42053.72         | 0.585 | 0.299 |
| <b>DP15</b> | 0.933 | 47.2     | 2.35 | 302.87 | 0.01196 | 0.05641 | 6446.60          | 0.234 | 0.713 |
| <b>DP16</b> | 0.487 | 56.2     | 3.38 | 222.37 | 0.01812 | 0.11045 | 1723.03          | 0.331 | 0.613 |
| <b>DP17</b> | 0.214 | 18.6     | 1.11 | 277.16 | 0.01319 | 0.05456 | 7436.49          | 0.102 | 0.872 |
| <b>DP18</b> | 0.915 | 40.6     | 4.06 | 171.77 | 0.00850 | 0.05017 | 9985.26          | 0.302 | 0.632 |
| <b>DP19</b> | 0.839 | 70.8     | 3.81 | 247.27 | 0.01160 | 0.06949 | 4085.64          | 0.468 | 0.463 |
| <b>DP20</b> | 0.355 | 28.7     | 3.72 | 112.96 | 0.01879 | 0.12748 | 2008.99          | 0.448 | 0.501 |
| <b>DP21</b> | 0.444 | 63.5     | 1.22 | 228.49 | 0.03845 | 0.21911 | 501.93           | 0.199 | 0.769 |
| <b>DP22</b> | 0.364 | 60.4     | 1.18 | 328.86 | 0.02896 | 0.14832 | 818.34           | 0.208 | 0.751 |
| <b>DP23</b> | 0.682 | 16.1     | 2.47 | 158.65 | 0.01076 | 0.05023 | 13544.42         | 0.087 | 0.891 |

---

|             |       |      |      |        |         |         |           |       |       |
|-------------|-------|------|------|--------|---------|---------|-----------|-------|-------|
| <b>DP24</b> | 0.509 | 32.4 | 4.02 | 210.36 | 0.00857 | 0.04847 | 8631.39   | 0.301 | 0.631 |
| <b>DP25</b> | 0.208 | 58.2 | 2.97 | 164.64 | 0.03725 | 0.26341 | 367.48    | 0.859 | 0.122 |
| <b>DP26</b> | 0.870 | 25.3 | 4.83 | 266.93 | 0.00228 | 0.01112 | 125746.67 | 0.531 | 0.358 |
| <b>DP27</b> | 0.408 | 52.2 | 3.92 | 358.95 | 0.00876 | 0.04781 | 5807.23   | 0.455 | 0.452 |
| <b>DP28</b> | 0.676 | 21.0 | 4.41 | 260.94 | 0.00351 | 0.01678 | 60782.57  | 0.409 | 0.498 |
| <b>DP29</b> | 0.563 | 50.6 | 3.11 | 342.46 | 0.01181 | 0.05955 | 4562.41   | 0.316 | 0.615 |
| <b>DP30</b> | 0.826 | 38.7 | 4.37 | 130.50 | 0.00902 | 0.05935 | 8058.49   | 0.351 | 0.584 |
| <b>DP31</b> | 0.793 | 42.1 | 3.48 | 107.16 | 0.02020 | 0.13750 | 2011.32   | 0.865 | 0.101 |
| <b>DP32</b> | 0.521 | 66.6 | 4.64 | 383.30 | 0.00509 | 0.02961 | 12857.03  | 0.642 | 0.247 |
| <b>DP33</b> | 0.739 | 55.0 | 3.31 | 308.30 | 0.01099 | 0.05724 | 5387.90   | 0.332 | 0.597 |
| <b>DP34</b> | 0.632 | 46.4 | 1.43 | 294.81 | 0.01882 | 0.08955 | 2599.15   | 0.172 | 0.789 |
| <b>DP35</b> | 0.957 | 69.4 | 3.77 | 322.42 | 0.00831 | 0.04438 | 8532.65   | 0.412 | 0.501 |
| <b>DP36</b> | 0.971 | 18.8 | 2.66 | 239.77 | 0.00636 | 0.02640 | 37016.11  | 0.168 | 0.791 |
| <b>DP37</b> | 0.894 | 28.7 | 1.78 | 180.36 | 0.01476 | 0.07207 | 6150.48   | 0.125 | 0.846 |
| <b>DP38</b> | 0.340 | 40.6 | 2.34 | 389.08 | 0.01390 | 0.06468 | 3599.39   | 0.254 | 0.688 |
| <b>DP39</b> | 0.285 | 74.6 | 2.00 | 118.89 | 0.07359 | 0.55721 | 118.06    | 0.591 | 0.221 |
| <b>DP40</b> | 0.259 | 34.0 | 2.09 | 198.15 | 0.02604 | 0.14617 | 1157.14   | 0.159 | 0.808 |
| <b>DP41</b> | 0.267 | 37.2 | 3.79 | 393.78 | 0.00782 | 0.03941 | 7957.32   | 0.420 | 0.488 |
| <b>DP42</b> | 0.739 | 66.3 | 3.88 | 288.31 | 0.00995 | 0.05715 | 5237.69   | 0.439 | 0.478 |
| <b>DP43</b> | 0.762 | 58.2 | 2.75 | 242.37 | 0.01750 | 0.09636 | 2421.57   | 0.256 | 0.693 |
| <b>DP44</b> | 0.512 | 34.7 | 1.97 | 303.69 | 0.01419 | 0.06512 | 4626.00   | 0.176 | 0.782 |
| <b>DP45</b> | 0.387 | 22.7 | 2.36 | 224.76 | 0.01356 | 0.06463 | 5734.72   | 0.134 | 0.834 |
| <b>DP46</b> | 0.567 | 62.0 | 4.64 | 217.37 | 0.00763 | 0.05157 | 6418.51   | 0.563 | 0.348 |
| <b>DP47</b> | 0.436 | 41.1 | 4.44 | 142.39 | 0.01132 | 0.08025 | 3717.34   | 0.491 | 0.444 |

---

|             |       |      |      |        |         |         |           |       |       |
|-------------|-------|------|------|--------|---------|---------|-----------|-------|-------|
| <b>DP48</b> | 0.670 | 51.9 | 1.25 | 177.52 | 0.03252 | 0.18465 | 891.81    | 0.164 | 0.808 |
| <b>DP49</b> | 0.450 | 42.3 | 4.07 | 158.89 | 0.01379 | 0.09292 | 2754.81   | 0.439 | 0.501 |
| <b>DP50</b> | 0.332 | 71.9 | 2.51 | 333.46 | 0.02515 | 0.14215 | 812.91    | 0.333 | 0.614 |
| <b>DP51</b> | 0.828 | 25.8 | 3.49 | 172.98 | 0.00874 | 0.04531 | 13645.41  | 0.178 | 0.779 |
| <b>DP52</b> | 0.916 | 27.2 | 4.94 | 372.67 | 0.00151 | 0.00676 | 257749.04 | 0.659 | 0.221 |
| <b>DP53</b> | 0.534 | 17.7 | 3.39 | 263.81 | 0.00619 | 0.02712 | 27566.44  | 0.230 | 0.714 |
| <b>DP54</b> | 0.616 | 31.2 | 4.22 | 352.83 | 0.00425 | 0.02016 | 33505.91  | 0.468 | 0.430 |
| <b>DP55</b> | 0.870 | 50.6 | 1.44 | 315.52 | 0.01579 | 0.07319 | 3847.37   | 0.195 | 0.761 |
| <b>DP56</b> | 0.923 | 19.4 | 2.91 | 270.49 | 0.00562 | 0.02296 | 43130.96  | 0.209 | 0.739 |
| <b>DP57</b> | 0.217 | 57.0 | 3.05 | 191.66 | 0.03072 | 0.20656 | 531.30    | 0.498 | 0.456 |
| <b>DP58</b> | 0.686 | 64.6 | 1.17 | 100.42 | 0.06237 | 0.43308 | 251.02    | 0.052 | 0.937 |
| <b>DP59</b> | 0.983 | 73.2 | 2.06 | 361.98 | 0.01551 | 0.07493 | 3303.25   | 0.263 | 0.680 |
| <b>DP60</b> | 0.283 | 47.8 | 1.80 | 126.25 | 0.05177 | 0.35047 | 284.94    | 0.416 | 0.427 |
| <b>DP61</b> | 0.644 | 55.8 | 3.42 | 254.04 | 0.01364 | 0.07681 | 3338.08   | 0.320 | 0.616 |
| <b>DP62</b> | 0.435 | 16.3 | 1.50 | 145.09 | 0.01692 | 0.08071 | 5743.31   | 0.055 | 0.932 |
| <b>DP63</b> | 0.845 | 38.0 | 2.60 | 199.28 | 0.01431 | 0.07501 | 4792.41   | 0.198 | 0.760 |
| <b>DP64</b> | 0.222 | 21.6 | 2.78 | 326.83 | 0.00948 | 0.04181 | 9717.52   | 0.218 | 0.729 |
| <b>DP65</b> | 0.524 | 42.8 | 1.10 | 178.33 | 0.03137 | 0.17352 | 984.06    | 0.131 | 0.844 |
| <b>DP66</b> | 0.340 | 48.9 | 1.60 | 364.95 | 0.02056 | 0.09894 | 1675.47   | 0.219 | 0.734 |
| <b>DP67</b> | 0.838 | 57.1 | 4.57 | 161.44 | 0.00820 | 0.05631 | 7222.50   | 0.516 | 0.408 |
| <b>DP68</b> | 0.480 | 53.5 | 3.97 | 319.64 | 0.00901 | 0.05072 | 5616.41   | 0.451 | 0.460 |
| <b>DP69</b> | 0.252 | 70.5 | 2.33 | 296.24 | 0.03184 | 0.18919 | 494.05    | 0.346 | 0.608 |
| <b>DP70</b> | 0.731 | 47.9 | 1.36 | 287.62 | 0.01854 | 0.08885 | 2722.47   | 0.178 | 0.782 |
| <b>DP71</b> | 0.634 | 30.8 | 2.12 | 114.50 | 0.02657 | 0.15823 | 1648.65   | 0.183 | 0.788 |

---

|             |       |      |      |        |         |         |           |       |       |
|-------------|-------|------|------|--------|---------|---------|-----------|-------|-------|
| <b>DP72</b> | 0.931 | 34.7 | 4.93 | 221.82 | 0.00287 | 0.01607 | 65607.64  | 0.527 | 0.363 |
| <b>DP73</b> | 0.496 | 39.0 | 1.87 | 385.05 | 0.01296 | 0.05669 | 5074.24   | 0.219 | 0.730 |
| <b>DP74</b> | 0.767 | 64.0 | 3.39 | 373.67 | 0.00963 | 0.04892 | 6295.63   | 0.400 | 0.517 |
| <b>DP75</b> | 0.301 | 29.2 | 2.97 | 243.02 | 0.01378 | 0.07133 | 4003.21   | 0.293 | 0.653 |
| <b>DP76</b> | 0.965 | 74.6 | 4.38 | 343.50 | 0.00544 | 0.03038 | 15390.49  | 0.557 | 0.336 |
| <b>DP77</b> | 0.365 | 61.3 | 3.80 | 130.59 | 0.02716 | 0.21045 | 638.69    | 0.826 | 0.152 |
| <b>DP78</b> | 0.711 | 18.4 | 3.03 | 206.72 | 0.00779 | 0.03528 | 21096.15  | 0.155 | 0.807 |
| <b>DP79</b> | 0.897 | 66.5 | 4.71 | 278.68 | 0.00463 | 0.02787 | 19241.36  | 0.579 | 0.311 |
| <b>DP80</b> | 0.589 | 25.8 | 4.06 | 120.68 | 0.01094 | 0.06892 | 6590.19   | 0.266 | 0.683 |
| <b>DP81</b> | 0.463 | 18.3 | 2.18 | 323.62 | 0.00795 | 0.03155 | 19398.13  | 0.179 | 0.777 |
| <b>DP82</b> | 0.597 | 72.6 | 1.07 | 199.16 | 0.04312 | 0.25430 | 429.61    | 0.185 | 0.787 |
| <b>DP83</b> | 0.659 | 67.7 | 2.63 | 359.85 | 0.01581 | 0.08043 | 2579.95   | 0.307 | 0.630 |
| <b>DP84</b> | 0.753 | 23.9 | 2.55 | 145.16 | 0.01432 | 0.07462 | 6323.58   | 0.121 | 0.851 |
| <b>DP85</b> | 0.202 | 34.3 | 3.26 | 119.00 | 0.02951 | 0.20816 | 732.61    | 0.670 | 0.226 |
| <b>DP86</b> | 0.420 | 38.6 | 2.31 | 208.68 | 0.02195 | 0.12031 | 1684.04   | 0.181 | 0.782 |
| <b>DP87</b> | 0.797 | 15.3 | 4.72 | 180.85 | 0.00277 | 0.01370 | 118494.15 | 0.367 | 0.548 |
| <b>DP88</b> | 0.892 | 45.9 | 4.00 | 393.93 | 0.00473 | 0.02222 | 27725.07  | 0.477 | 0.421 |
| <b>DP89</b> | 0.840 | 30.0 | 1.57 | 344.57 | 0.00935 | 0.03775 | 13869.73  | 0.186 | 0.769 |
| <b>DP90</b> | 0.536 | 24.8 | 3.19 | 241.69 | 0.00920 | 0.04428 | 10894.30  | 0.206 | 0.744 |
| <b>DP91</b> | 0.386 | 50.7 | 4.50 | 333.04 | 0.00613 | 0.03598 | 9506.96   | 0.562 | 0.332 |
| <b>DP92</b> | 0.246 | 28.9 | 3.70 | 138.59 | 0.01776 | 0.11673 | 2001.42   | 0.247 | 0.707 |
| <b>DP93</b> | 0.945 | 55.6 | 1.67 | 378.09 | 0.01301 | 0.05773 | 5468.86   | 0.229 | 0.718 |
| <b>DP94</b> | 0.617 | 65.5 | 3.43 | 229.00 | 0.01710 | 0.10455 | 1917.05   | 0.376 | 0.566 |
| <b>DP95</b> | 0.981 | 43.8 | 4.94 | 277.20 | 0.00260 | 0.01420 | 70870.72  | 0.606 | 0.277 |

|              |       |      |      |        |         |         |          |       |       |
|--------------|-------|------|------|--------|---------|---------|----------|-------|-------|
| <b>DP96</b>  | 0.305 | 52.0 | 1.94 | 253.32 | 0.02889 | 0.16147 | 797.60   | 0.215 | 0.746 |
| <b>DP97</b>  | 0.681 | 69.6 | 2.84 | 172.07 | 0.02850 | 0.18528 | 819.27   | 0.496 | 0.457 |
| <b>DP98</b>  | 0.502 | 39.2 | 4.31 | 293.69 | 0.00601 | 0.03283 | 13642.21 | 0.449 | 0.455 |
| <b>DP99</b>  | 0.360 | 57.8 | 1.36 | 306.32 | 0.02865 | 0.14912 | 849.18   | 0.199 | 0.761 |
| <b>DP100</b> | 0.805 | 62.5 | 4.16 | 108.26 | 0.01796 | 0.13903 | 1736.60  | 0.204 | 0.782 |

## 5. Nomenclature

|                  |                                                                                             |
|------------------|---------------------------------------------------------------------------------------------|
| <i>ANN</i>       | Artificial neural network for short                                                         |
| <i>BO</i>        | Bayesian optimization for short                                                             |
| $c_i$            | The mole concentration of component i, mol/m <sup>3</sup>                                   |
| $d$              | Groove depth, mm                                                                            |
| $D$              | The hydrodynamic diameter of the reactor cross section, m                                   |
| $E$              | The engulfment rate in terms of micromixing, s <sup>-1</sup>                                |
| <i>EDR</i>       | Energy dissipation rate for short                                                           |
| $F$              | Flow rate, mL/min                                                                           |
| <i>GPR</i>       | Gaussian process regression for short                                                       |
| $L_G$            | Distance between two mixing elements, mm                                                    |
| $L_M$            | Length of a mixing element, mm                                                              |
| <i>MSE</i>       | Mean square error for short                                                                 |
| $P$              | Local pressure field, Pa                                                                    |
| $\Delta P_{SAR}$ | Pressure drop in the full domain of reactors                                                |
| $r_i$            | Intrinsic reaction rate of component i, mol/(m <sup>3</sup> ·s)                             |
| $R_I$            | Outer radius of tube-in-tube reactors, mm                                                   |
| $R_O$            | Inner radius of tube-in-tube reactors, mm                                                   |
| $R^2$            | Coefficient of determination                                                                |
| $Re$             | Reynold number                                                                              |
| $S$              | Skewness of curved grooves                                                                  |
| <i>SAR</i>       | Split-and-recombine reactor for short                                                       |
| $t_d$            | Mesomixing characteristic time, s                                                           |
| $t_m$            | Micromixing characteristic time, s                                                          |
| $u$              | Local velocity field, m/s                                                                   |
| $u_m$            | Average velocity along the flow direction, m/s                                              |
| $V$              | Volume of the reactor fluid domain                                                          |
| $X_0$            | Ratio of initial flow rates in a tubular reactor                                            |
| $X_B$            | Volume of micromixed fluid relative to the whole fluid                                      |
| $X_u$            | Volume fraction which contains the partially segregated fluid as islands, embedded in a sea |
| $Y_1$            | Intermediate product yield                                                                  |

|       |                                   |
|-------|-----------------------------------|
| $Y_2$ | Final product yield               |
| $z$   | Axial position of the reactors, m |

---

**Greek symbols**


---

|               |                                                                                   |
|---------------|-----------------------------------------------------------------------------------|
| $\alpha$      | Circulation angle, °                                                              |
| $\varepsilon$ | Energy dissipation rate, m <sup>2</sup> /s <sup>3</sup>                           |
| $\Lambda_c$   | Average from the integral scale of concentration fluctuations to Kolmogorov scale |
| $\mu$         | Dynamic viscosity of the fluid, Pa·s                                              |
| $\nu$         | Kinematic viscosity of the fluid, Pa·s                                            |
| $\rho$        | Density of the fluid, kg/m <sup>3</sup>                                           |
| $\varphi_B$   | Ratio of fluid volume change after micromixing                                    |

---

## 6. References

1. Commenge, J.-M. and L. Falk, Villiermaux–Dushman protocol for experimental characterization of micromixers. *Chemical Engineering and Processing: Process Intensification*, 2011. **50**(10): p. 979-990.
2. Ghanem, A., et al., Static mixers: Mechanisms, applications, and characterization methods - A review. *Chemical Engineering Research & Design*, 2014. **92**(2): p. 205-228.
3. Arian, E. and W. Pauer, A comprehensive investigation of the incorporation model for micromixing time calculation. *Chemical Engineering Research and Design*, 2021. **175**: p. 296-308.
4. Wenzel, D., et al., On the reactant concentration and the reaction kinetics in the Villiermaux-Dushman protocol. *Chemical Engineering and Processing - Process Intensification*, 2018. **130**: p. 332-341.
5. Fournier, M.C., L. Falk, and J. Villiermaux, A new parallel competing reaction system for assessing micromixing efficiency—Experimental approach. *Chemical Engineering Science*, 1996. **51**(22): p. 5053-5064.
